# Supplementary material for: Implication of Netrin-1 Gain of Expression in Canine Nodal Lymphoma
Source: MDPI journal article supplement (doi:10.3390/vetsci9090494), 2022-09-10
Supplement: s1 [file s1]

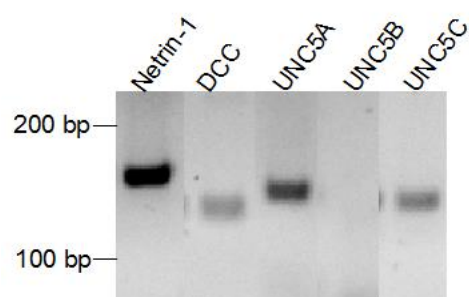

**Figure S1.** NETRIN-1 AND ITS DEPENDENCE RECEPTORS EXPRESSION (Q-RT-PCR) IN A CANINE-T-CELL LINE (PER-VAS) Netrin-1 and its dependence receptors expression levels were analysed by RT-PCR. Results of PCR products migration on a 2% agarose gel is presented.

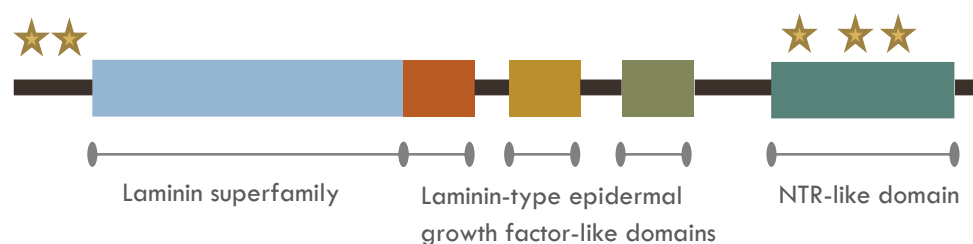

**Figure S2.** STRUCTURE OF NETRIN-1.(localization of the 5 different amino acids between the human and the canine orthologs.).

## Normal lymph node

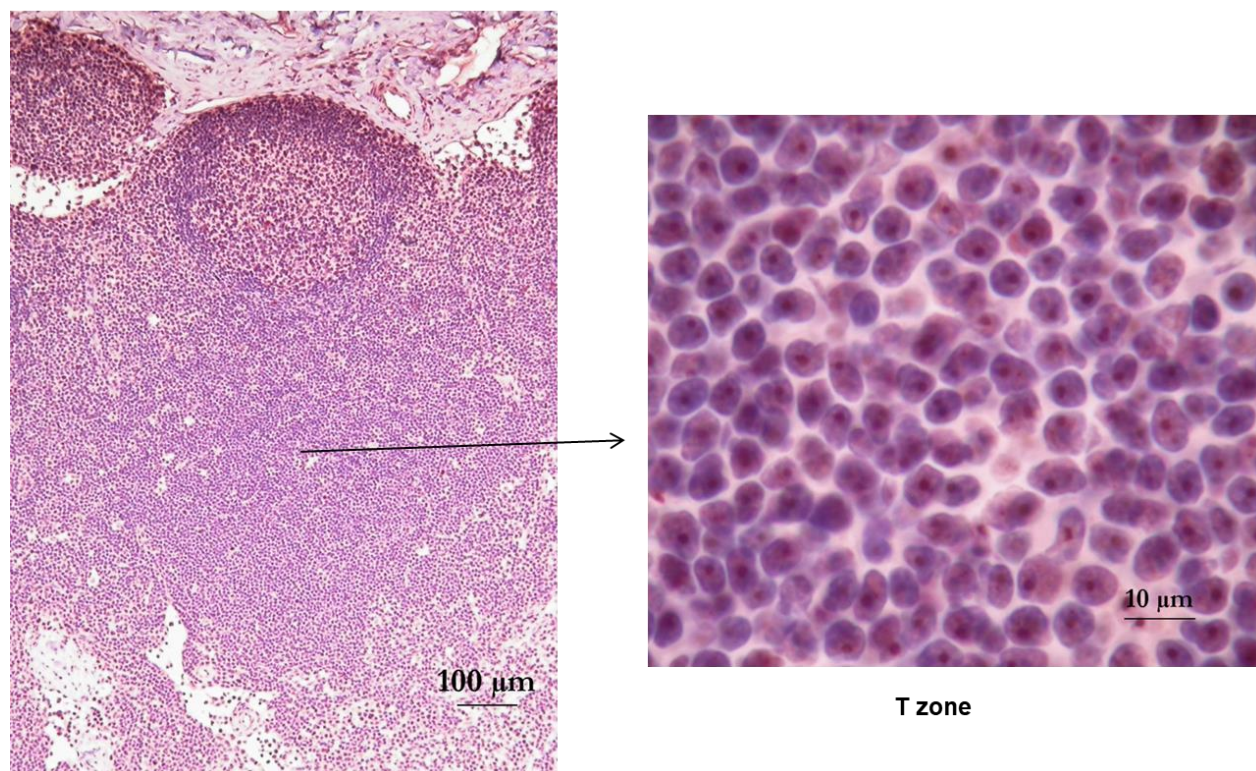

**Figure S3.** Netrin-1 immunostaining in canine normal lymph nodes at low magnification, showing immunostaining enforcement in subcapsular sinus region. A zoom on cortical T-zone is present showing nucleolar immunostaining.

**Table S1.** Fux cytometry data of control samples and samples from dog lymphomas.

| Flux cytometry              |            |                               |                                  |                           |         |          |       |
|-----------------------------|------------|-------------------------------|----------------------------------|---------------------------|---------|----------|-------|
|                             | Sampling   | Diagnosis                     | Grade<br>(L : Low /<br>H : High) | % of<br>Positive<br>Cells | MFI     |          |       |
|                             |            |                               |                                  |                           | Control | Netrin-1 | Δ MFI |
| B-cell lymphomas = 19 cases |            |                               |                                  |                           |         |          |       |
| TILLY                       | 19/06/2014 | small cell NOS                | H                                | 99,2                      | 6706    | 159736   | 22,8  |
| LASSEIGNE                   | 03/11/2014 | Immunoblastic                 | H                                | 99,4                      | 8308    | 197192   | 22,7  |
| DEROLEZ                     | 05/01/2015 | Immunoblastic                 | H                                | 92,7                      | 5775    | 37540    | 5,5   |
| GUIGARD                     | 26/01/2015 | Immunoblastic                 | H                                | 98,9                      | 3615    | 38538    | 9,7   |
| MARKIEWITZ                  | 07/01/2015 | Immunoblastic                 | H                                | 98,8                      | 4350    | 33020    | 6,6   |
| PAIR                        | 03/02/2015 | Immunoblastic                 | H                                | 96,7                      | 6113    | 40572    | 5,6   |
| DELORME                     | 09/04/2015 | Transforming<br>Marginal Zone | H                                | 93                        | 4546    | 18101    | 3,0   |
| DANTHONY                    | 06/04/2015 | Polymorphic<br>centroblastic  | H                                | 70                        | 5464    | 29759    | 4,4   |
| MALATY                      | 16/09/2015 | Immunoblastic                 | H                                | 91,5                      | 7554    | 48309    | 5,4   |
| VIGUIER                     | 09/06/2015 | Burkitt like                  | H                                | 85                        | 4136    | 29260    | 6,1   |
| NIOGRET                     | 13/10/2015 | Transforming<br>Marginal Zone | H                                | 98,5                      | 3493    | 16518    | 3,7   |

|                                           |            |                              |   |      |       |        |      |
|-------------------------------------------|------------|------------------------------|---|------|-------|--------|------|
| SOUVIGNET                                 | 09/11/2015 | Polymorphic<br>centroblastic | H | 90,8 | 2212  | 15612  | 6,1  |
| GRIMOUX                                   | 09/06/2016 | Polymorphic<br>centroblastic | H | 98,6 | 4950  | 103447 | 19,9 |
| PIETROPAOLI                               | 17/03/2016 | Polymorphic<br>centroblastic | H | 98,7 | 4984  | 96151  | 18,3 |
| INDELICATO                                | 29/04/2016 | Burkitt like                 | H | 98,3 | 1663  | 30065  | 17,1 |
| FAGET                                     | 05/12/2016 | Burkitt like                 | H | 89,1 | 9819  | 94125  | 8,6  |
| BAPTISTAL                                 | 14/12/2016 | Immunoblastic                | H | 97,5 | 3232  | 47860  | 13,8 |
| CORNET                                    | 18/01/2017 | Polymorphic<br>centroblastic | H | 98,9 | 3157  | 45210  | 13,3 |
| MORETON                                   | 12/01/2017 | Polymorphic<br>centroblastic | H | 97,9 | 6571  | 92769  | 13,1 |
| <b>T-cell<br/>lymphomas = 7<br/>cases</b> |            |                              |   |      |       |        |      |
| MOSCICKI                                  | 21/11/2014 | Lymphoblastic                | H | 99,9 | 3231  | 51988  | 15,1 |
| GOUMOT                                    | 27/11/2014 | Lymphoblastic                | H | 99,8 | 5646  | 97681  | 16,3 |
| BRIVADIS                                  | 16/02/2015 | Pleomorphic, large<br>cells  | H | 88,1 | 2715  | 29129  | 9,7  |
| SOTTON                                    | 23/02/2016 | Immunoblastic                | H | 98,3 | 3427  | 86707  | 24,3 |
| BAUTHIER                                  | 18/05/2016 | non classified               | H | 98,5 | 2764  | 42445  | 14,4 |
| ROLLAND                                   | 01/10/2015 | subcutaneous                 | B | 85,5 | 3980  | 11278  | 1,8  |
| JACQUIER                                  | 29/11/2016 | mucous                       | B | 92,4 | 16777 | 82702  | 3,9  |
| <b>Control lymph<br/>node = 5 cases</b>   |            |                              |   |      |       |        |      |
| Beagle1 MdG                               | 26/10/2015 |                              |   | 90,5 | 3034  | 11904  | 2,9  |
| Beagle1 MdD                               | 26/10/2015 |                              |   | 85   | 3011  | 12561  | 3,2  |
| Beagle2 MdG                               | 26/10/2015 |                              |   | 90,2 | 2851  | 14335  | 4,0  |
| Beagle2 MdD                               | 26/10/2015 |                              |   | 84   | 2764  | 7321   | 1,6  |
| SOLIVERES                                 | 12/02/2015 |                              |   | 94,2 | 2688  | 14367  | 4,3  |
